# Supplementary material for: The physical health of people with severe mental illness in Bangladesh and Pakistan: A cross-sectional survey
Source: Research Square preprint supplement (doi:10.21203/rs.3.rs-429162/v1), 2021-04-20
Supplement: Supplementary file 1 [file ff97b9eb3b40db0c9a3ea700.docx]

This is an electronic appendix accompanying the paper “The physical health of people with severe mental illness in Bangladesh and Pakistan: A cross-sectional survey. ”

| **Blood test investigation in people with SMI from South Asia** | | | | | | |
| --- | --- | --- | --- | --- | --- | --- |
|  | Bangladesh | | Pakistan | | Overall | |
|  | n | Mean (S.D.)[95% C.I.] | n | Mean (S.D.)[95% C.I.] | n | Mean (S.D.)[95% C.I.] |
| Glycated haemoglobin (HbA1c) (%) | 1352 | 5.5 (0.8) [5.4-5.5] | 886 | 5.0 (1.6) [4.9-5.2] | 2238 | 5.2 (5.2) [5.2-5.3] |
| Glycated haemoglobin (HbA1c ≥6.50%) * | 81 | (6.0) [4.8-7.3] | 28 | (3.2) [2.1-4.4] | 109 | 4.9 [4.1-5.8] |
| Haemoglobin g/dl for male | 827 | 14.2 (0.8) [14.1-14.2] | 532 | 15.1 (4.0) [14.8-15.5] | 1359 | 14.5 (14.5) [14.3-14.6] |
| Haemoglobin g/dl for female | 525 | 10.7 (0.6) [10.6-10.7] | 355 | 12.9 (4.3) [12.6-13.4] | 880 | 11.6 (10.7) [11.3-11.7] |
| Haemoglobin ( ≤13 g/dl males ≤12 g/dl females ) * | 611 | (45.2) [42.6-48.0] | 244 | (27.5) [24.7-30.5] | 855 | 38.2 [36.2-40.2] |
| **Lipid profile** |  |  |  |  |  |  |
| Triglycerides (mg/dl) | 1352 | 176.9 (102.1) [171.6-182.2] | 886 | 170.8 (86.9) [164.8-176.7] | 2238 | 174.4 (96.3) [170.4-178.4] |
| High triglycerides (>180 mg/dl) * | 542 | (40.1) [37.4-42.8] | 320 | (36.1) [32.8-39.4] | 862 | 38.5 [36.5-40.6] |
| Total cholesterol (mg/dl) | 1352 | 176.6 (34.3) [174.7-178.5] | 885 | 202.7 (71.0) [198.4-207.6] | 2237 | 186.8 (53.6) [184.7-189.0] |
| Total cholesterol (≥190 mg/dl) * | 432 | (32.0) [29.5-34.5] | 495 | (55.9) [52.4-59.1] | 927 | 41.4 [39.5-43.4] |
| HDL cholesterol (mg/dl) | 1352 | 43.7 (3.4) [43.6-43.9] | 882 | 50.9 (14.7) [49.9-51.9] | 2234 | 46.5 (10.2) [46.1-46.9] |
| HDL cholesterol (≤40 mg/dl for males and ≤50 for females)* | 562 | (41.6) [39.0-44.4] | 315 | (35.7) [32.8-39.0] | 877 | 39.3 [37.3-41.3] |
| LDL cholesterol (mg/dl) | 1352 | 97.4 (28.3) [95.9-99.0] | 882 | 105.6 (40.8) 102.8-108.3] | 2234 | 100.6 (34.0) [99.2-102.0] |
| LDL cholesterol ( ≥100 mg/dl)* | 603 | (44.6) [42.0-47.1] | 476 | (54.0) [50.6-57.3] | 1079 | 48.3 [46.2-50.4] |
| **Thyroid function test** |  |  |  |  |  |  |
| TSH (uIU/ml) | 1352 | 2.3 (2.2) [2.2-2.4] | 828 | 2.6 (8.3) [2.1-3.3] | 2180 | 2.4 (5.4) [2.2-2.6] |
| TSH ( ≤0.35 uIU/mL)* | 17 | (1.3) [0.7-1.9] | 9 | (1.1) [0.5-1.8] | 26 | 1.2 [0.8-1.7] |
| TSH ( ≥4.50 uIU/ml)* | 92 | (6.8) [5.5-8.1] | 54 | (6.5) [4.9-8.2] | 146 | 6.7 [5.7-7.8] |
| Calcium (mg/dl) | 1352 | 9.0 (1.0) [8.9-9.1] | 881 | 10.3 (4.6) [10.0-10.6] | 2233 | 9.5 (3.0) [9.4-9.6] |
| Calcium (≤8.5 mg/dl) * | 534 | (39.5) [37.0-42.0] | 109 | (12.4) [10.3-14.7] | 643 | 28.8 [27-30.6] |
| Calcium ( ≥10.5 mg/dl)* | 36 | (2.7) [1.8-3.6] | 348 | (39.5) [36.2-42.8] | 384 | 17.2 [15.9-18.6] |
| **Liver function test** |  |  |  |  |  |  |
| Total bilirubin (mg/dl) | 1352 | 0.4 (0.1) [0.4-0.4] | 885 | 0.6 (2.2) [0.5-0.8] | 2237 | 0.5067 (1.3) [0.45-0.5] |
| Total bilirubin (≥1.2 mg/dl) * | 2 | (0.1) [0.0-0.4] | 35 | (4.0) [2.7-5.4] | 37 | 1.7 [1.2-2.3] |
| AST (U/L) | 1352 | 34.1 (18.2) [33.2-35.2] | 883 | 39.4 (18.2) [38.2-40.6] | 2235 | 36.2 (18.3) [35.4-36.9] |
| AST (≥35U/l) * | 580 | (42.9) [40.2-45.6] | 461 | (52.2) [48.9-55.3] | 1041 | 46.6 [44.5-48.6] |
| ALT (U/L) | 1352 | 35.5 (20.9) [34.5-36.8] | 885 | 36.5 (29.0) [34.7-38.6] | 2237 | 35.9 (24.4) [34.9-36.9] |
| ALT ( ≤7 U/L) * | 0 | 0 | 1 | (0.1) [0.0-0.3] | 1 | 0 [0-0.3] |
| ALT (≥56 U/l) * | 123 | (9.1) [7.7-10.6] | 130 | (14.7) [12.5-17.0] | 253 | 11.3 [10.1-12.7] |
| ALP (U/L) | 1352 | 109.6 (41.1) [107.4-111.9] | 885 | 115.1 (48.2) [112.1-118.5] | 2237 | 111.7 (44.1) [109.9-113.5] |
| ALP (≤41U/L) *‡ | 19 | (1.4) [0.8-2.1] | 11 | (1.2) [0.6-2.0] | 30 | 1.3 [0.9-1.9] |
| ALP (≥133U/L) * | 480 | (35.5) [32.9-37.8] | 216 | (24.4) [21.7-27.3] | 696 | 31.1 [29.2-33.1] |
| **Total protein** |  |  |  |  |  |  |
| Albumin (g/dl) | 1352 | 4.4 (0.5) [4.3-4.4] | 885 | 5.1 (15.9) [4.6-6.3] | 2237 | 4.6 (10.0) [4.2-5.1] |
| Albumin (≤4.5 g/dl) * | 969 | (71.7) [69.3-74.0] | 355 | (40.1) [36.7-43.3] | 1324 | 59.2 [57.2-61.1] |
| Albumin (≥5.3 g/dl) * | 21 | (1.6) [0.9-2.2] | 74 | (8.4) [6.6-10.2] | 95 | 4.2 [3.5-5.2] |
| Globulin (g/dl) | 1352 | 3.6 (1.0) [3.6-3.7] | 881 | 4.4 (25.6) [3.2-6.4] | 2233 | 3.9 (16.1) [3.2-4.6] |
| Globulin (≤2.5 g/dl) * | 172 | (12.7) [11.0-14.6] | 178 | (20.2) [17.6-22.9] | 350 | 15.7 [14.2-17.2] |
| Globulin (≥3.5 g/dl) * | 668 | (49.4) [46.8-51.9] | 356 | (40.4) [37.3-43.7] | 1024 | 45.9 [43.8-47.9] |
| Albumin to globulin ratio | 1352 | 1.4 (0.4) [1.3-1.4] | 881 | 3.3 (18.0) [2.2-4.5] | 2233 | 2.1 (11.3) [1.6-2.5] |
| Albumin to globulin ratio (≤1.2 and ≥2.5 ) * | 612 | (45.3) [42.6-47.9] | 355 | (40.3) [37.1-43.8] | 967 | 43.3 [41.3-45.4] |
| **Renal function test** |  |  |  |  |  |  |
| Serum Urea (mg/dl) | 1352 | 26.0 (7.9) [25.6-26.4] | 884 | 30.4 (10.8) [29.8-31.1] | 2236 | 27.7 (9.3) [27.4-28.1] |
| Serum Urea (≥43 mg/dl) * | 27 | (2.0) [1.3-2.8] | 87 | (9.8) [8.0-11.8] | 114 | 5.1 [4.3-6.1] |
| Creatinine (mg/dl) | 1352 | 0.9 (0.2) [0.9-0.9] | 887 | 0.9 (0.7) [0.9-1.0] | 2239 | 0.9 (0.4) [0.1-0.9] |
| Creatinine (≥ 0.95 mg/dl females and ≥1.14 mg/dl males) * | 150 | (11.1) [9.4-12.8] | 132 | (14.9) [12.6-17.1] | 282 | 12.6 [11.3-14.0] |
| *Values presented as n (%) [95% C.I.s], ‡ Data on ALP (≤41U/L) are not reported in some columns due to low numbers for statistical disclosure control. | | | | | | |
